1        **Infection avoidance behaviour in adult fruit flies is sex-specific and**  
2                    **depends on prior exposure to a viral pathogen**

3

4                    Pedro F. Vale<sup>1,2,\*</sup>, Michael D. Jardine<sup>1</sup>

5

6        <sup>1</sup> Institute of Evolutionary Biology, School of Biological Sciences, University of  
7                    Edinburgh. Edinburgh EH9-3FL

8

9        <sup>2</sup> Centre for Immunity, Infection and Evolution, University of Edinburgh.  
10                    Edinburgh EH9 3FL

11

12

13                    \* Email for correspondence : [pedro.vale@ed.ac.uk](mailto:pedro.vale@ed.ac.uk)

# **Abstract**

15

16 Infection avoidance behaviours are the first line of defence against pathogenic  
 17 encounters. Behavioural plasticity in response to internal or external cues can  
 18 therefore generate heterogeneity in infection. We tested whether *Drosophila*  
 19 *melanogaster* exhibits infection avoidance behaviour during foraging, and  
 20 whether this behaviour is modified by prior exposure to Drosophila C Virus  
 21 (DCV) and by the risk of DCV encounter. We examined two measures of  
 22 infection avoidance: (1) the motivation to feed in the presence of an infection  
 23 risk and (2) the preference to feed on a clean food source over a potentially  
 24 infectious source. We found no clear evidence for preference of clean food  
 25 sources over potentially infectious ones. However, infection avoidance was  
 26 present in female fruit, which were less motivated to feed when presented  
 27 with a risk of encountering DCV, but this was only the case if they had been  
 28 previously exposed to this viral pathogen. We discuss the relevance of  
 29 plasticity in avoidance behaviours during ecologically relevant scenarios such  
 30 as foraging for host fitness and pathogen spread.

31

32 Key-words: Infection, avoidance behaviour, Drosophila, DCV, foraging

33

## Background

Hosts vary considerably in their ability to acquire and transmit infection (Barron et al., 2015; Fellous et al., 2012; Paull et al., 2011; Susi et al., 2015; Vale and Little, 2009). Given the ubiquitous presence of pathogens and parasites in natural environments, mounting a timely and efficient immune response to all possible pathogenic challenges would be physiologically costly and ultimately ineffective. Individuals capable of reducing the probability of contacting parasites, infected conspecifics or infectious environments can therefore not only prevent the deleterious effects of infection, but also circumvent the undesirable energetic costs of immune responses, including immunopathology (Barron et al., 2015; Curtis, 2014). Avoiding infection is therefore the first line of non-immunological defence against infection (Parker et al., 2011), and it is known to occur across a broad range of host taxa, including humans (Curtis, 2014; Moore, 2013).

Like most traits, infection avoidance behaviours are likely to vary according to the context of infection, and pathogens are major drivers this context (Barron et al., 2015; Curtis, 2014; Lazzaro and Little, 2009; Moore, 2013; Vale et al., 2008; Wolinska and King, 2009). Pathogens may alter host responses in two ways. First, by altering the immuno-physiology of the host during infection, pathogens can alter host behaviour (Adamo, 2006; Adelman and Martin, 2009). Second, pathogens also modify the host external environment by increasing the likelihood of exposure to novel infections, and these external cues of infection risk are also known to influence host behavioural responses (Barron et al., 2015; Curtis, 2014). Understanding variation in infection avoidance behaviours therefore provides an important functional link between the neurological, behavioural and immunological processes that together govern the spread of disease (Adamo, 2006).

Insects are ideal systems to investigate the interplay between infection and behaviour (Adamo, 2006; Parker et al., 2010). The fruit fly *Drosophila* is especially amenable to these studies, as it is one of the best model systems for host-pathogen interactions (Neyen et al., 2014) and behavioural ecology and genetics (Dubnau, 2014; Sokolowski, 2001). One of the best-studied pathogenic interactions in *Drosophila* is the host response to systemic and

enteric infection with *Drosophila C Virus* (DCV) (Dostert et al., 2005; Ferreira et al., 2014). DCV is a horizontally transmitted +ssRNA virus that naturally infects the fly gut (Huszar and Imler, 2008), causing intestinal obstruction, severe metabolic dysfunction and eventually death (Chtarbanova et al., 2014). As a consequence of its pathology, female flies infected with DCV are also known to exhibit behavioural modifications, such as reduced locomotion and increased sleep (Vale and Jardine, 2015). The *Drosophila*-DCV interaction therefore offers a powerful system to investigate the ecological consequences that may arise from the physiological and behavioural effects of enteric viral infections.

In the present study we used a combination of controlled experimental infections and foraging choice assays, to test whether adult *D. melanogaster* are able to avoid potentially infectious environments when foraging for food, and if avoidance behaviour is modified in response to virus exposure history and to different risks of acquiring DCV infection. We find evidence for avoidance behaviours in the form of reduced motivation to feed according to the risk of infection. However, these effects were only present in female flies, indicating potentially important sexual dimorphism in infection avoidance, and were only present when females were previously exposed to DCV.

## Methods

### *Fly and virus stocks*

All flies used were from a long-term laboratory stock of Wolbachia-free *Drosophila melanogaster* Oregon R line, maintained on Lewis medium in standard conditions: 25°C, with a 16:8h light:dark cycle. Fly stocks were routinely kept on a 14-day cycle with non-overlapping generations under low larval densities. The DCV culture used in this experiment was grown in Schneider *Drosophila* Line 2 (DL2) as described in (Vale and Jardine, 2015). Ten-fold serial dilutions of this culture (diluted in Ringers buffer solution) were aliquoted and frozen at -80°C for long-term storage before use.

### *Prior virus exposure*

Flies used in the foraging choice assays were obtained by preparing 10 vials of Lewis medium and yeast containing ten mated females. Flies were allowed to lay eggs for 48 hours resulting in age-matched progeny reared in similar larval densities. Two to three days after eclosion, these progeny were exposed to DCV via the oral route of infection (Vale and Jardine, 2015), in order to test the effect of previous exposure to virus on avoidance behaviour during foraging. Briefly, single-sex groups of 20 flies were placed in vials containing agar previously sprayed with DCV ("exposed" to 50  $\mu$ l of  $10^8$  viral copies/ml) or the equivalent volume of Ringers buffer solution as a control ("not exposed"). This procedure produced 10 replicate vials of either healthy or virus-exposed male or female flies. DCV exposure using this protocol typically results in ~20% mortality (Fig. S1 and (Vale and Jardine, 2015)).

#### *Foraging choice assays*

Following 5 days of virus exposure, we set up independent foraging choice assays in cages - cylindrical transparent plastic containers (12 cm in diameter) containing two equally spaced plastic vials of standard Lewis fly medium and yeast. For each combination of "exposed" and "not exposed" male or female flies, we set up two sets of cages to simulate different risks of infection: a "no risk" environment, with two clean vials (sprayed with sterile Ringers solution), and a "high-risk" environment where one of the vials was sprayed with DCV, as described above. Six replicate 20-fly groups were allocated to the "high-risk" chambers and four replicates to the "no risk" chambers, resulting in a total of 40 independent foraging choice cages. Flies were added to the chamber from a neutrally placed hole in the lid, and the number of flies that settled on each vial was recorded every 30 minutes for six hours. Care was taken to randomise the position of the cages so that the orientation of the light did not influence the choice of the flies in any systematic way.

#### *Statistical Analysis*

To measure infection avoidance, we took two approaches. First, we hypothesised that the motivation to feed would be lower in environments where the risk of infection is higher (Curtis, 2014). We therefore compared the motivation to feed between the "no risk" and "high-risk" cages, measured

as the proportion of flies inside a cage that chose to feed on any of the provided food sources. We also asked whether flies that chose to feed showed any evidence of avoiding potentially infectious food sources. For this analysis we focussed on the proportion of flies choosing the clean food source over the infectious food source in the “high risk” cages. In both analyses of ‘motivation to feed’ and ‘infection avoidance’, data on the proportion of flies choosing each food source within each replicate cage were analysed with a generalised linear model assuming binomial error and logit link function, and included fly ‘sex’, ‘previous exposure’ and ‘infection risk’ as fixed effects. ‘Replicate cage’ was included as a random effect, nested within treatments. We also analysed the average motivation to feed and infection avoidance across all time points, in a model including “time” as a random effect. Treatment specific contrasts were used to test the significance of pairwise comparisons. Analyses were carried out using JMP 12 (JMP).

151

## 152 Results

Once inside the cages, only a fraction of flies chose either of the food sources provided, and this motivation to feed increased over time for flies in all treatment groups ( $\chi^2_1 = 11.00$ ,  $p=0.001$ ; Fig. S2). The rate at which motivation increased differed between sexes (‘Time  $\times$  Sex’ interaction,  $\chi^2_1 = 12.47$ ,  $p=0.0004$ ), and on average female flies showed greater motivation to feed than males ( $\chi^2_1 = 5.01$ ,  $p=0.025$ ), with 67% of female and 36% of male flies making a choice to feed on any of the provided substrates during the 6 hours of observation (Fig. 1).

161

Across the entire six-hour observation period, the motivation to feed differed between sexes, and depended both on their previous exposure and on their current risk of infection (‘Sex’  $\times$  ‘risk of infection’  $\times$  ‘Previous exposure’ interaction,  $\chi^2_1 = 21.82$ ,  $p<0.0001$ ). The proportion of males choosing any food substrate did not vary with previous exposure to DCV in either high-risk ( $\chi^2_1 = 2.21$ ,  $p=0.137$ ) or no-risk environments ( $\chi^2_1 = 0.09$ ,  $p=0.764$ ; Fig. 1).

168

In female flies however, previous exposure and current infection risk affected the motivation to feed on the provided food sources. When there was no risk of infection (Fig. 1, light grey bars) the motivation to feed was greater

172 in females that were previously exposed to DCV than in otherwise healthy,  
173 non-exposed females ( $\chi^2_1 = 104.11$ ,  $p < 0.001$ ). Among females that were  
174 previously exposed to infection, we found that the presence of a risk of  
175 acquiring infection resulted in lower foraging effort - with just over 50% of  
176 flies making the choice to feed - compared to females in cages where there  
177 was no risk of acquiring infection, where over 80% of flies made the choice to  
178 feed (Fig. 1;  $\chi^2_1 = 168.48$ ,  $p < 0.001$ ).

179

180 Once flies had made the choice to feed on one of the provided food  
181 sources, the choice between a clean and a potentially infectious food source  
182 was not affected by previous exposure to DCV ('previous exposure',  $\chi^2_1 =$   
183 0.513,  $p = 0.47$ ) in either male or females ('sex',  $\chi^2_1 = 0.595$ ,  $p = 0.44$ ; Fig. 2).

184

## 185 Discussion

186 The ability to detect and discriminate between clean and potentially  
187 infectious environments is vital to avoid the adverse consequences of  
188 infection. In this study we tested if infection avoidance behaviour in  
189 *Drosophila melanogaster* is modified by its previous exposure to a viral  
190 pathogen and by the risk of infection with that same pathogen when  
191 encountered during foraging.

192

193 The higher motivation to feed of some female flies when the risk of infection  
194 was absent (Fig. 1) suggests flies were able to identify external cues of  
195 infection risk. Identifying infection cues is a general prerequisite of avoidance  
196 behaviours and occurs across a wide range of different taxa. For example,  
197 lobsters are known to detect and avoid virus-infected conspecifics (Behringer  
198 et al., 2006); fruit flies and nematodes are capable of avoiding pathogenic  
199 bacteria (Babin et al., 2014; Meisel and Kim, 2014); gypsy moth larvae are able  
200 to detect and avoid virus-contaminated foliage (Parker et al., 2010); sheep  
201 have been found to prefer to graze in parasite-poor patches (Hutchings et al.,  
202 2007); and it has been argued that the disgust response in humans has  
203 evolved because it decreases contact with potential infection (Curtis et al.,  
204 2011). It is unclear how flies are able to detect food sources contaminated  
205 with a viral pathogen. In *Drosophila* and *C. elegans* avoidance of pathogenic  
206 bacteria is enabled by evolutionary conserved olfactory and chemosensory

207 pathways (Babin et al., 2014; Meisel and Kim, 2014), while avoidance of  
208 parasitic wasps appears to be mainly enabled by the visual sensory system  
209 (Kacsoh et al., 2013). While avoiding virus infected conspecifics is probably  
210 driven by visual cues of infection (Behringer et al., 2006), it remains unclear  
211 how virus-contaminated environments may be detected by *Drosophila*.

212

213       Infection avoidance, measured as a reduced motivation to feed, was  
214 clearest when flies had been previously exposed to infection (Fig. 1). In  
215 addition to responding to external cues of infection, internal physiological  
216 cues therefore also modify avoidance behaviour. Behavioural modifications  
217 due to infection are widely reported among animals (Barber and Dingemanse,  
218 2010; Moore, 2013), and can be classified into (i) parasitic manipulation that  
219 enhances parasite transmission (Moore, 2013) (ii) sickness behaviours that  
220 benefit the host by conserving energetic resources during infection (Adelman  
221 and Martin, 2009), or (iii) side-effects of pathogenicity that do not benefit the  
222 host or the parasite (Barber and Dingemanse, 2010). Female flies infected  
223 with DCV are known to experience increased lethargy and sleep (Vale and  
224 Jardine, 2015), so these effects could also explain the reduced feeding activity  
225 we detected in female flies that had been previously exposed to DCV. Another  
226 potential explanation for reduced motivation to feed in previously exposed  
227 flies is infection-induced anorexia (Ayres and Schneider, 2009), a commonly  
228 described sickness behaviour (Adelman and Martin, 2009). However, it is  
229 unlikely that a lower motivation feed is simply a symptom of a “sick” fly,  
230 because it varied according risk of infection, and even reached 80% in  
231 exposed flies when foraging in a ‘no risk’ environment (Fig. 1). This suggests  
232 that flies are actively avoiding contact with the potentially contagious food  
233 source by lowering their foraging effort.

234

235       The fact that only female flies demonstrated avoidance is an indication  
236 that any potentially adaptive effects of avoiding infection may be related to  
237 oviposition, which coincides with feeding. For flies previously exposed to DCV,  
238 avoiding infection would not confer substantial direct benefits given the  
239 physiological and behavioural costs of this infection (Arnold et al., 2013;  
240 Chtarbanova et al., 2014; Vale and Jardine, 2015), but would however reduce  
241 the exposure of future offspring to infection. While flies previously exposed to



DCV do not appear to immune primed following an initial viral exposure (Longdon et al., 2013), our results point to a sort of behavioural priming, where females previously exposed to infection avoid foraging in potentially infectious environments.

## Conclusions

Using a combination of experimental infections and behavioural assays, we find evidence for avoidance behaviours in *Drosophila* in the form of reduced motivation to feed, which was most pronounced when flies were faced with an increased risk of encountering an infectious food source. However, these effects were only present in female flies, indicating potentially important sexual dimorphism in infection avoidance, and were only present when females were previously exposed to DCV. Understanding how avoidance behaviours may vary is therefore important for our understanding of how disease will spread in natural populations (Barron et al., 2015), and more broadly how pathogens might evolve in response to variation in host responses to infection (Boots and Bowers, 1999; McLeod and Day, 2015).

## Competing interests

The authors declare that they have no competing interests.

## Author contributions

PFV conceived the study. PFV and MDJ designed the experiment. MDJ carried out the experimental work. PFV analysed the data, wrote the manuscript and provided all research consumables.

## Acknowledgements

We thank H. Cowan and H. Borthwick for helpful technical assistance and the members of the Vale, Obbard and Ross labs for helpful suggestions. This work was supported by a strategic award from the Wellcome Trust for the Centre for Immunity, Infection and Evolution (grant reference no. 095831), and by a Society in Science – Branco Weiss fellowship, both awarded to P. Vale. P.Vale is also supported by a Chancellor's Fellowship from the School of Biological Sciences, University of Edinburgh.

## 276 **Figure legends**

277

278 **Fig. 1.** The motivation to feed, measured as the proportion of flies in the cage  
 279 that fed on any of the provided food sources. Single sex-groups of flies that  
 280 had either been previously exposed to DCV or to a sterile inoculum were  
 281 tested in a no-risk environment (choice between two clean vials; light grey) or  
 282 a high-risk environment (choice between a clean vial and a DCV-contaminated  
 283 vial; dark grey). Data are means  $\pm$  SE.

284

285 **Fig. 2.** Infection avoidance, measured as the proportion of flies in the cage that  
 286 preferred to settle on the clean food source relative to the DCV-contaminated  
 287 food source. Single sex-groups of flies that had either been previously exposed  
 288 to DCV or to a sterile inoculum were tested in a high-risk environment (choice  
 289 between a clean vial and a DCV-contaminated vial). Data are means  $\pm$  SE.

290

# References

- Adamo, S. A. (2006). Comparative psychoneuroimmunology: evidence from the insects. *Behav. Cogn. Neurosci. Rev.* 5, 128–140. doi:10.1177/1534582306289580.
- Adelman, J. S., and Martin, L. B. (2009). Vertebrate sickness behaviors: Adaptive and integrated neuroendocrine immune responses. *Integr. Comp. Biol.* 49, 202–214. doi:10.1093/icb/icp028.
- Arnold, P. A., Johnson, K. N., and White, C. R. (2013). Physiological and metabolic consequences of viral infection in *Drosophila melanogaster*. *J. Exp. Biol.* 216, 3350–3357. doi:10.1242/jeb.088138.
- Ayres, J. S., and Schneider, D. S. (2009). The Role of Anorexia in Resistance and Tolerance to Infections in *Drosophila*. *PLoS Biol* 7, e1000150. doi:10.1371/journal.pbio.1000150.
- Babin, A., Kolly, S., Schneider, F., Dolivo, V., Zini, M., and Kawecki, T. J. (2014). Fruit flies learn to avoid odours associated with virulent infection. *Biol. Lett.* 10, 20140048. doi:10.1098/rsbl.2014.0048.
- Barber, I., and Dingemanse, N. J. (2010). Parasitism and the evolutionary ecology of animal personality. *Philos. Trans. R. Soc. Lond. B Biol. Sci.* 365, 4077–4088. doi:10.1098/rstb.2010.0182.
- Barron, D., Gervasi, S., Pruitt, J., and Martin, L. (2015). Behavioral competence: how host behaviors can interact to influence parasite transmission risk. *Curr. Opin. Behav. Sci.* 6, 35–40. doi:10.1016/j.cobeha.2015.08.002.
- Behringer, D. C., Butler, M. J., and Shields, J. D. (2006). Ecology: Avoidance of disease by social lobsters. *Nature* 441, 421–421. doi:10.1038/441421a.
- Boots, M., and Bowers, R. G. (1999). Three mechanisms of host resistance to microparasites-avoidance, recovery and tolerance-show different evolutionary dynamics. *J. Theor. Biol.* 201, 13–23. doi:10.1006/jtbi.1999.1009.
- Chtarbanova, S., Lamiable, O., Lee, K.-Z., Galiana, D., Troxler, L., Meignin, C., et al. (2014). *Drosophila* C virus systemic infection leads to intestinal obstruction. *J. Virol.* doi:10.1128/JVI.02320-14.
- Curtis, V. A. (2014). Infection-avoidance behaviour in humans and other animals. *Trends Immunol.* 35, 457–464. doi:10.1016/j.it.2014.08.006.
- Curtis, V., de Barra, M., and Aunger, R. (2011). Disgust as an adaptive system for disease avoidance behaviour. *Philos. Trans. R. Soc. Lond. B. Biol. Sci.* 366, 389–401. doi:10.1098/rstb.2010.0117.
- Dostert, C., Jouanguy, E., Irving, P., Troxler, L., Galiana-Arnoux, D., Hetru, C., et al. (2005). The Jak-STAT signaling pathway is required but not

331 sufficient for the antiviral response of drosophila. *Nat. Immunol.* 6,  
332 946–953. doi:10.1038/ni1237.

333 Dubnau, J. (2014). *Behavioral Genetics of the Fly (Drosophila Melanogaster)*.  
334 Cambridge University Press.

335 Fellous, S., Duncan, A. B., Quillery, E., Vale, P. F., and Kaltz, O. (2012). Genetic  
336 influence on disease spread following arrival of infected carriers. *Ecol.*  
337 *Lett.* 15, 186–192. doi:10.1111/j.1461-0248.2011.01723.x.

338 Ferreira, Á. G., Naylor, H., Esteves, S. S., Pais, I. S., Martins, N. E., and Teixeira, L.  
339 (2014). The Toll-Dorsal Pathway Is Required for Resistance to Viral  
340 Oral Infection in *Drosophila*. *PLoS Pathog.* 10.  
341 doi:10.1371/journal.ppat.1004507.

342 Huszar, T., and Immler, J. (2008). “*Drosophila* Viruses and the Study of Antiviral  
343 Host-Defense,” in *Advances in Virus Research* (Academic Press), 227–  
344 265. Available at:  
345 [http://www.sciencedirect.com/science/article/pii/S0065352708004](http://www.sciencedirect.com/science/article/pii/S0065352708004065)  
346 065.

347 Hutchings, M. ., Knowler, K. ., McAnulty, R., and McEwan, J. . (2007). Genetically  
348 resistant sheep avoid parasites to a greater extent than do susceptible  
349 sheep. *Proc. R. Soc. B Biol. Sci.* 274, 1839–1844.  
350 doi:10.1098/rspb.2007.0398.

351 JMP Cary, NC: SAS Institute Inc.

352 Kacsoh, B. Z., Lynch, Z. R., Mortimer, N. T., and Schlenke, T. A. (2013). Fruit  
353 Flies Medicate Offspring After Seeing Parasites. *Science* 339, 947–950.  
354 doi:10.1126/science.1229625.

355 Lazzaro, B. P., and Little, T. J. (2009). Immunity in a variable world. *Philos.*  
356 *Trans. R. Soc. Lond. B. Biol. Sci.* 364, 15–26.  
357 doi:10.1098/rstb.2008.0141.

358 Longdon, B., Cao, C., Martinez, J., and Jiggins, F. M. (2013). Previous Exposure  
359 to an RNA Virus Does Not Protect against Subsequent Infection in  
360 *Drosophila melanogaster*. *PLoS ONE* 8, e73833.  
361 doi:10.1371/journal.pone.0073833.

362 McLeod, D. V., and Day, T. (2015). Pathogen evolution under host avoidance  
363 plasticity. *Proc. Biol. Sci.* 282. doi:10.1098/rspb.2015.1656.

364 Meisel, J. D., and Kim, D. H. (2014). Behavioral avoidance of pathogenic  
365 bacteria by *Caenorhabditis elegans*. *Trends Immunol.* 35, 465–470.  
366 doi:10.1016/j.it.2014.08.008.

367 Moore, J. (2013). An overview of parasite-induced behavioral alterations – and  
368 some lessons from bats. *J. Exp. Biol.* 216, 11–17.  
369 doi:10.1242/jeb.074088.

- 370   Neyen, C., Bretscher, A. J., Binggeli, O., and Lemaitre, B. (2014). Methods to  
371       study *Drosophila* immunity. *Methods San Diego Calif* 68, 116–128.  
372       doi:10.1016/j.ymeth.2014.02.023.
- 373   Parker, B. J., Barribeau, S. M., Laughton, A. M., de Roode, J. C., and Gerardo, N.  
374       M. (2011). Non-immunological defense in an evolutionary framework.  
375       *Trends Ecol. Evol.* 26, 242–248. doi:10.1016/j.tree.2011.02.005.
- 376   Parker, B. J., Elder, B. D., and Dwyer, G. (2010). Host behaviour and exposure  
377       risk in an insect-pathogen interaction. *J. Anim. Ecol.* 79, 863–870.  
378       doi:10.1111/j.1365-2656.2010.01690.x.
- 379   Paull, S. H., Song, S., McClure, K. M., Sackett, L. C., Kilpatrick, A. M., and Johnson,  
380       P. T. (2011). From superspreaders to disease hotspots: linking  
381       transmission across hosts and space. *Front. Ecol. Environ.* 10, 75–82.  
382       doi:10.1890/110111.
- 383   Sokolowski, M. B. (2001). *Drosophila*: Genetics meets behaviour. *Nat. Rev.*  
384       *Genet.* 2, 879–890. doi:10.1038/35098592.
- 385   Susi, H., Barrès, B., Vale, P. F., and Laine, A.-L. (2015). Co-infection alters  
386       population dynamics of infectious disease. *Nat. Commun.* 6.  
387       doi:10.1038/ncomms6975.
- 388   Vale, P. F., and Jardine, M. D. (2015). Sex-specific behavioural symptoms of  
389       viral gut infection and *Wolbachia* in *Drosophila melanogaster*. *J. Insect*  
390       *Physiol.* 82, 28–32. doi:10.1016/j.jinsphys.2015.08.005.
- 391   Vale, P. F., and Little, T. J. (2009). Measuring parasite fitness under genetic and  
392       thermal variation. *Heredity* 103, 102–109.
- 393   Vale, P. F., Salvaudon, L., Kaltz, O., and Fellous, S. (2008). The role of the  
394       environment in the evolutionary ecology of host parasite interactions.  
395       *Infect. Genet. Evol.* 8, 302–305. doi:10.1016/j.meegid.2008.01.011.
- 396   Wolinska, J., and King, K. C. (2009). Environment can alter selection in host-  
397       parasite interactions. *Trends Parasitol.* 25, 236–244.  
398       doi:10.1016/j.pt.2009.02.004.

399

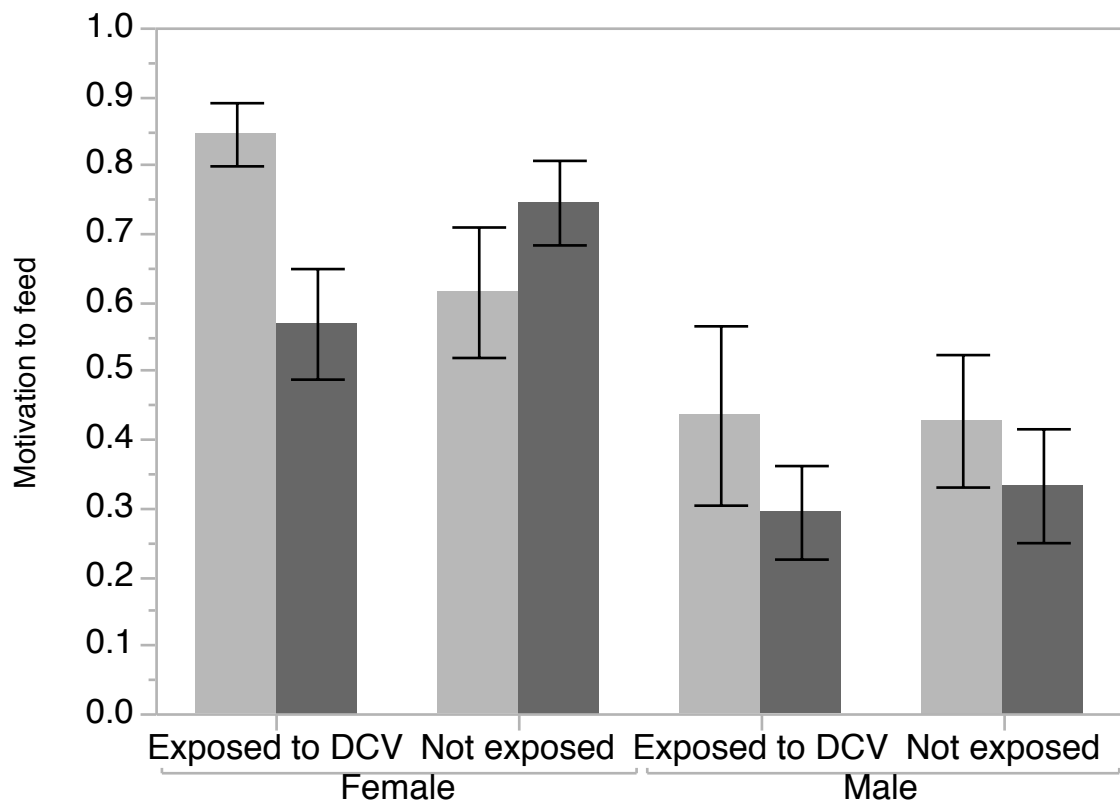

Proportion choosing clean vial

1  
0.9  
0.8  
0.7  
0.6  
0.5  
0.4  
0.3  
0.2  
0.1  
0

Exposed to DCV

Not exposed

Exposed to DCV

Not exposed

Female

Male

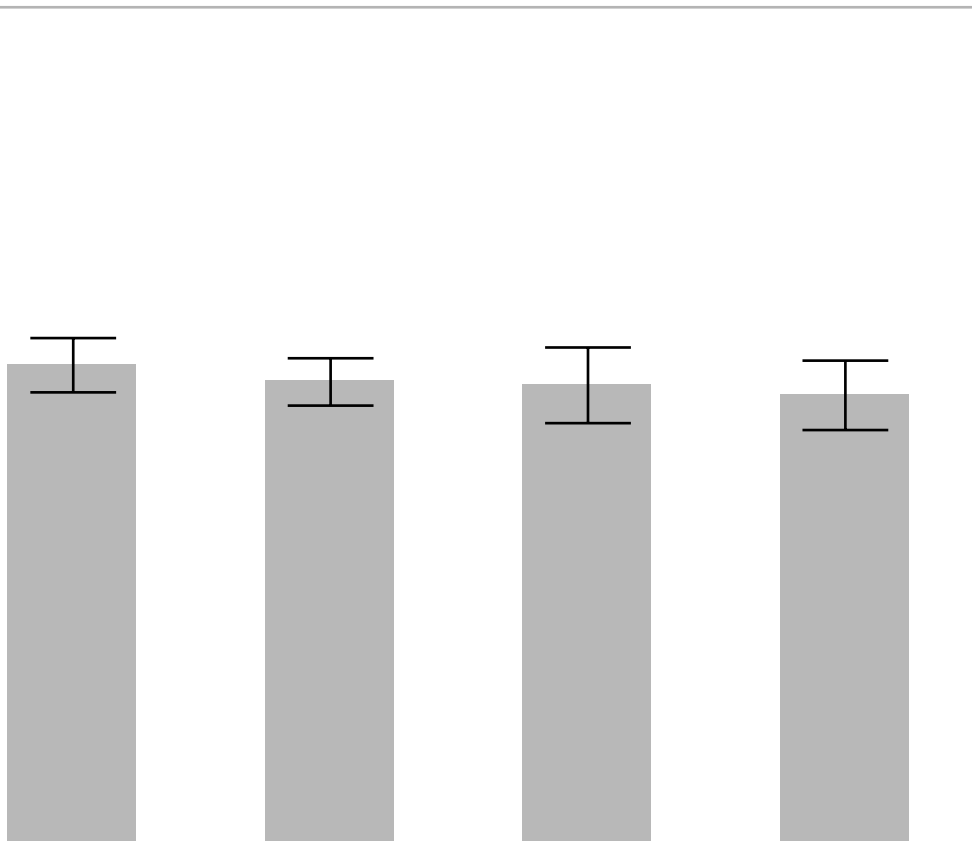

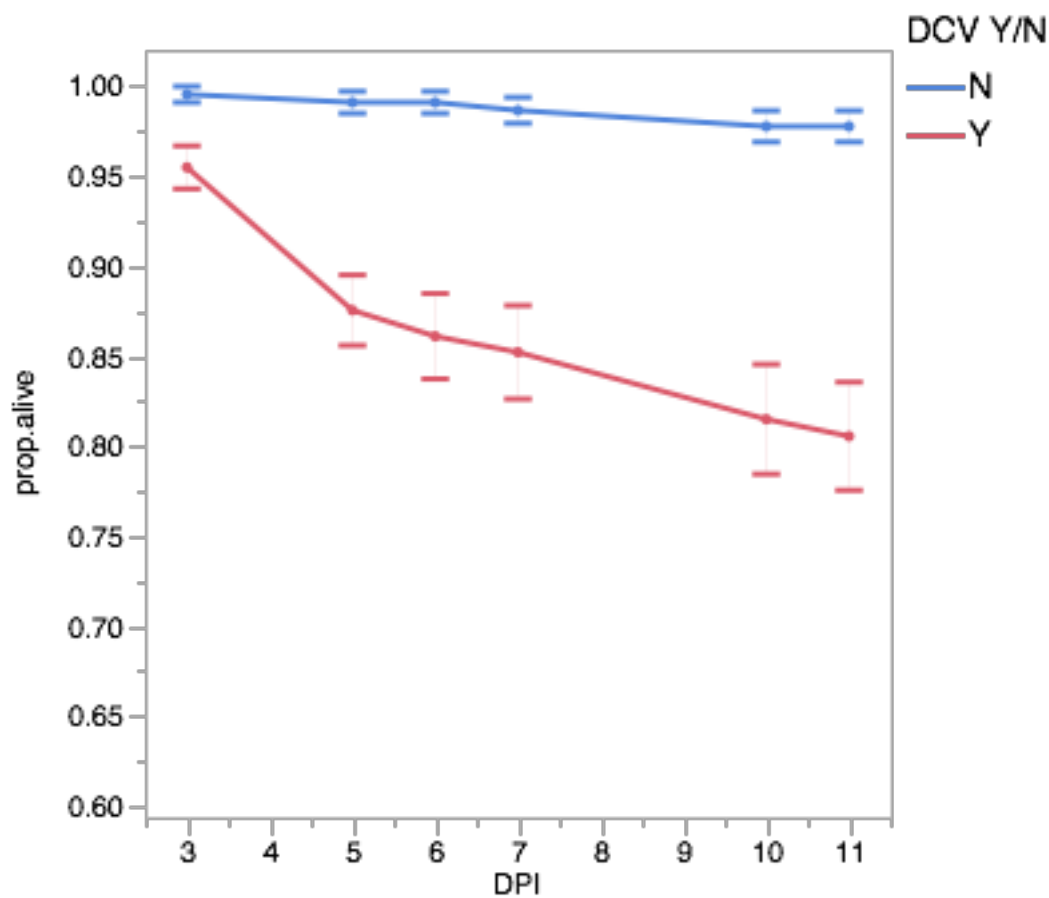



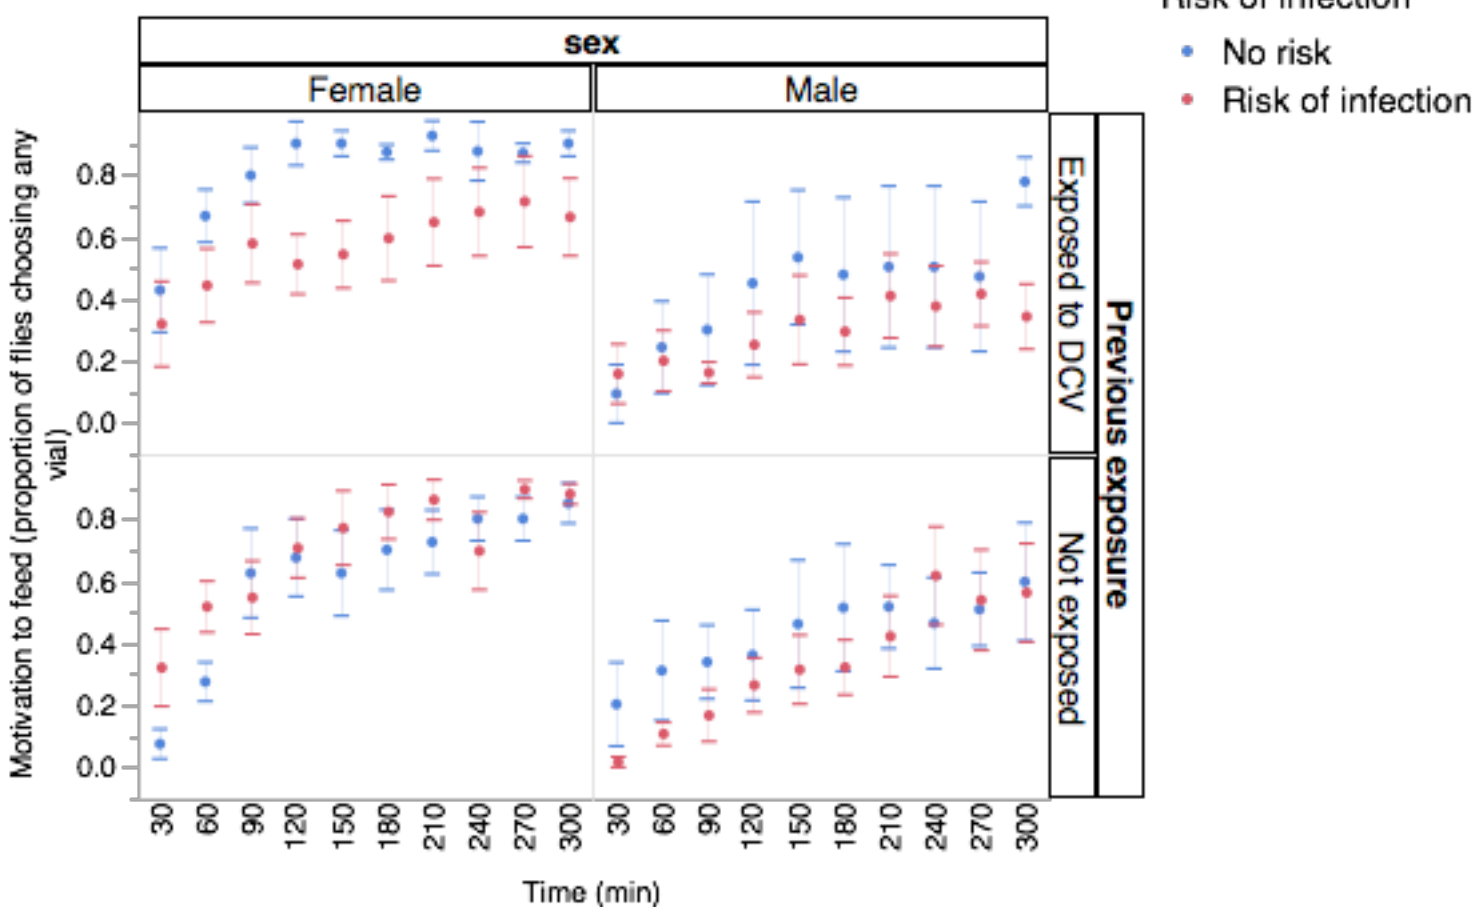

Source: http://www.biorxiv.org/content/10.1101/039750v1.full.pdf
